# Supplementary material for: Antivascular endothelial growth factor for macular oedema secondary to retinal vein occlusion: a systematic review and meta-analysis
Source: HighWire-hosted journal article supplement (doi:10.1136/bmjophth-2022-001086), 2022-11-01
Supplement: bmjophth-2022-001086supp001_data_supplement.pdf [file bmjophth-2022-001086supp001_data_supplement.pdf]

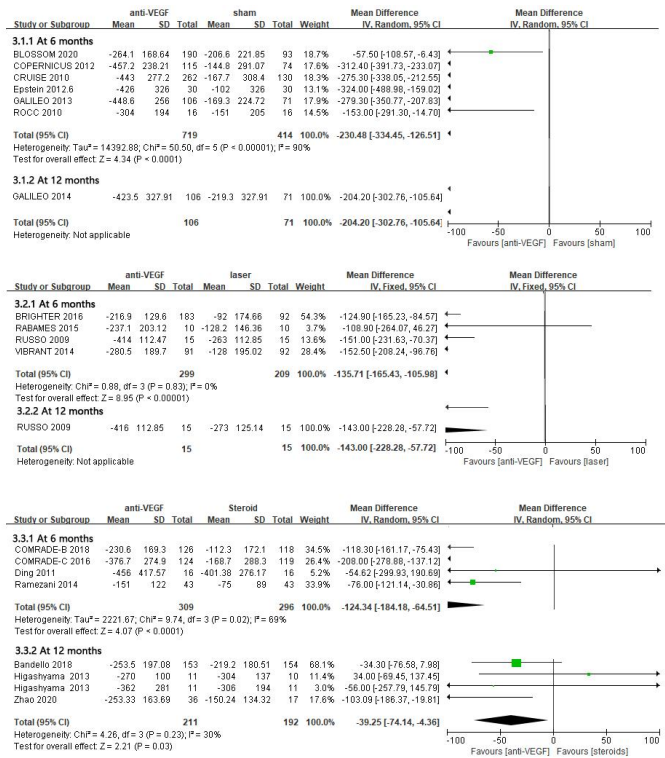

Fig.S1 A forest plot diagram comparing the mean change in CRT of anti-VEGF with sham, laser and steroids at 6 and 12 months.

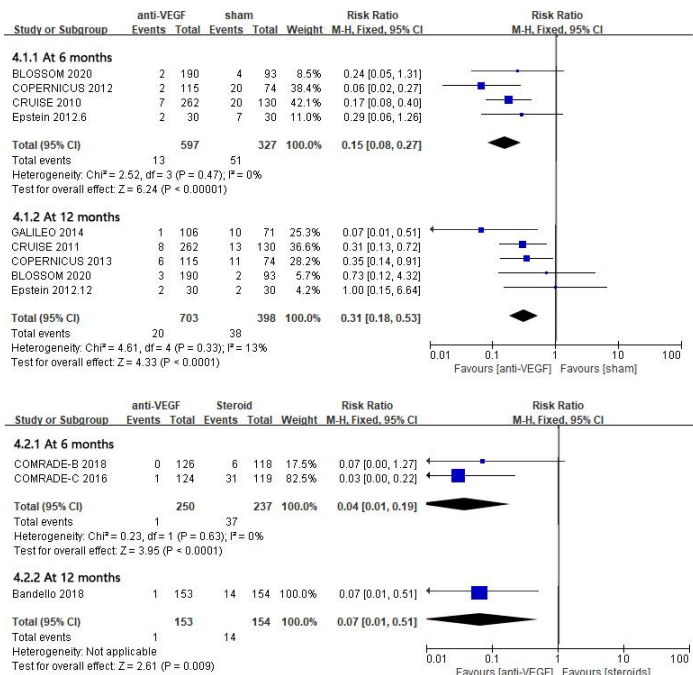

Fig.S2 A forest plot diagram comparing the proportion of eyes losing of 15 ETDRS letters or more of anti-VEGF with sham and steroids at 6 and 12 months.

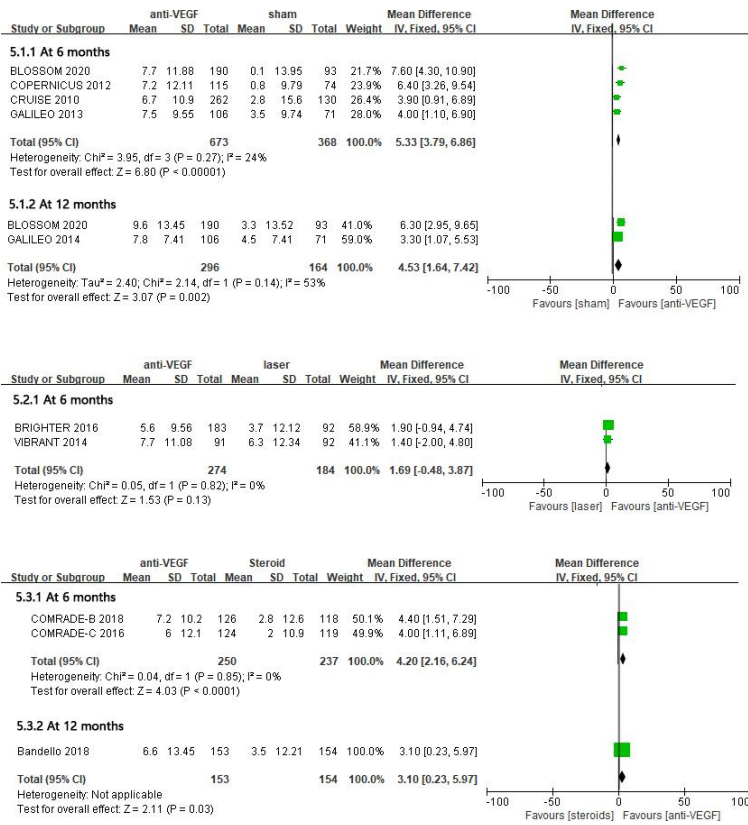

Fig.S3 A forest plot diagram comparing the mean change in quality of life of anti-VEGF with sham, laser and steroids at 6 and 12 months.

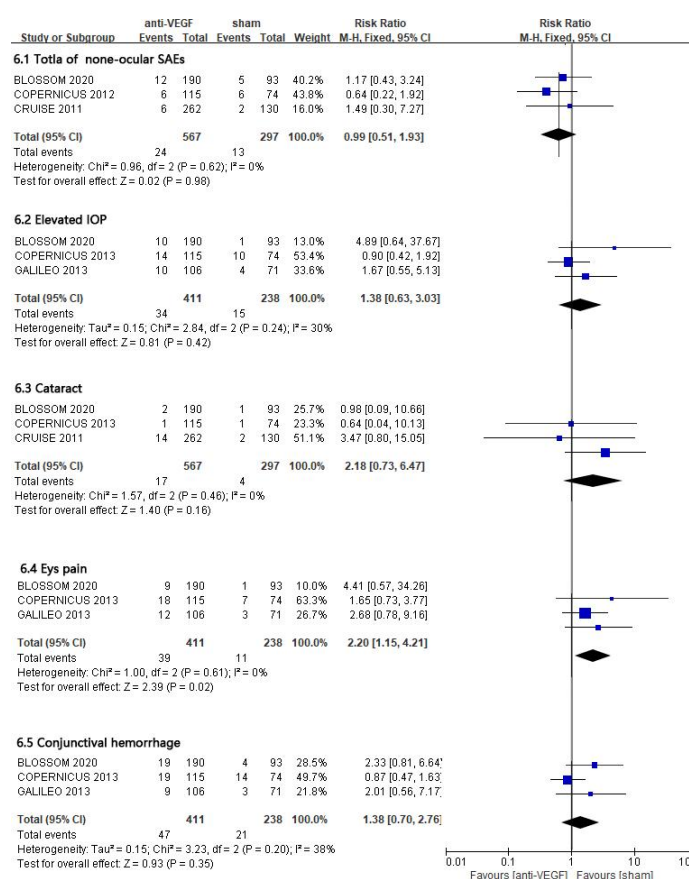

Fig.S4 A forest plot diagram comparing the safety outcomes of anti-VEGF with sham, including a total of non-SAEs, elevated IOP, cataract, eye pain, and conjunctival haemorrhage.

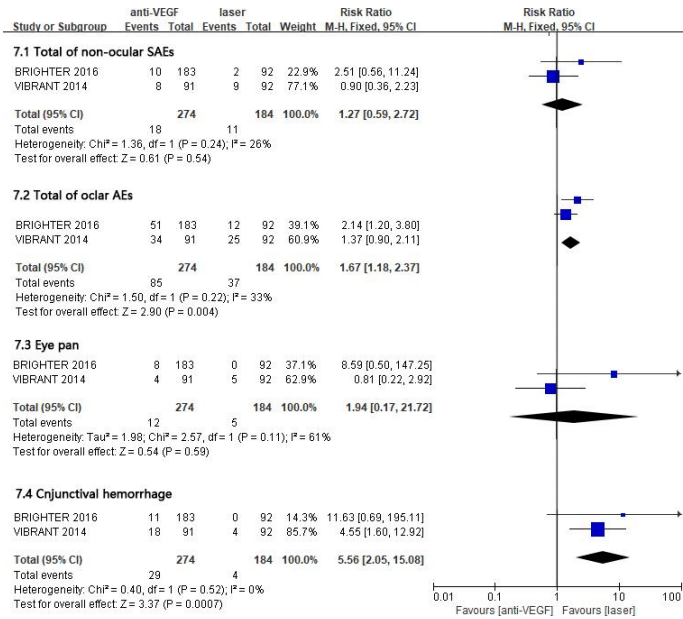

Fig.S5 A forest plot diagram comparing the safety outcomes of anti-VEGF with laser, including a total of non-SAEs and ocular AEs, eye pain, and conjunctival haemorrhage.

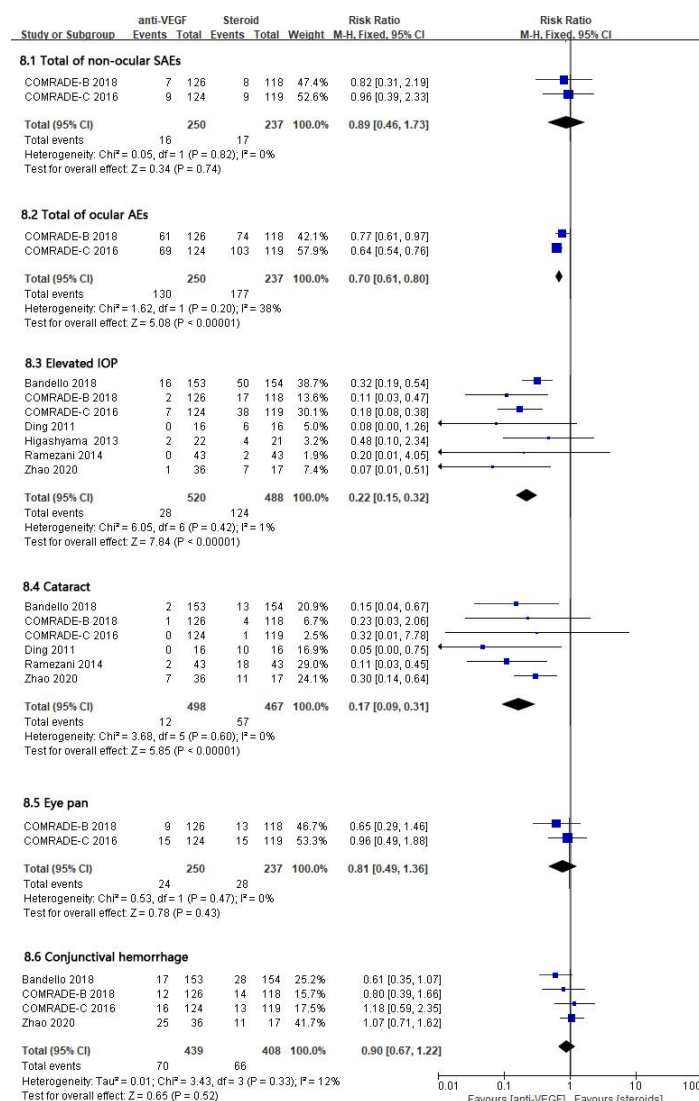

Fig.S6 A forest plot diagram comparing the safety outcomes of anti-VEGF with steroids, including a total of non-SAEs and ocular AEs, elevated IOP, cataract, eye pain, and conjunctival haemorrhage.

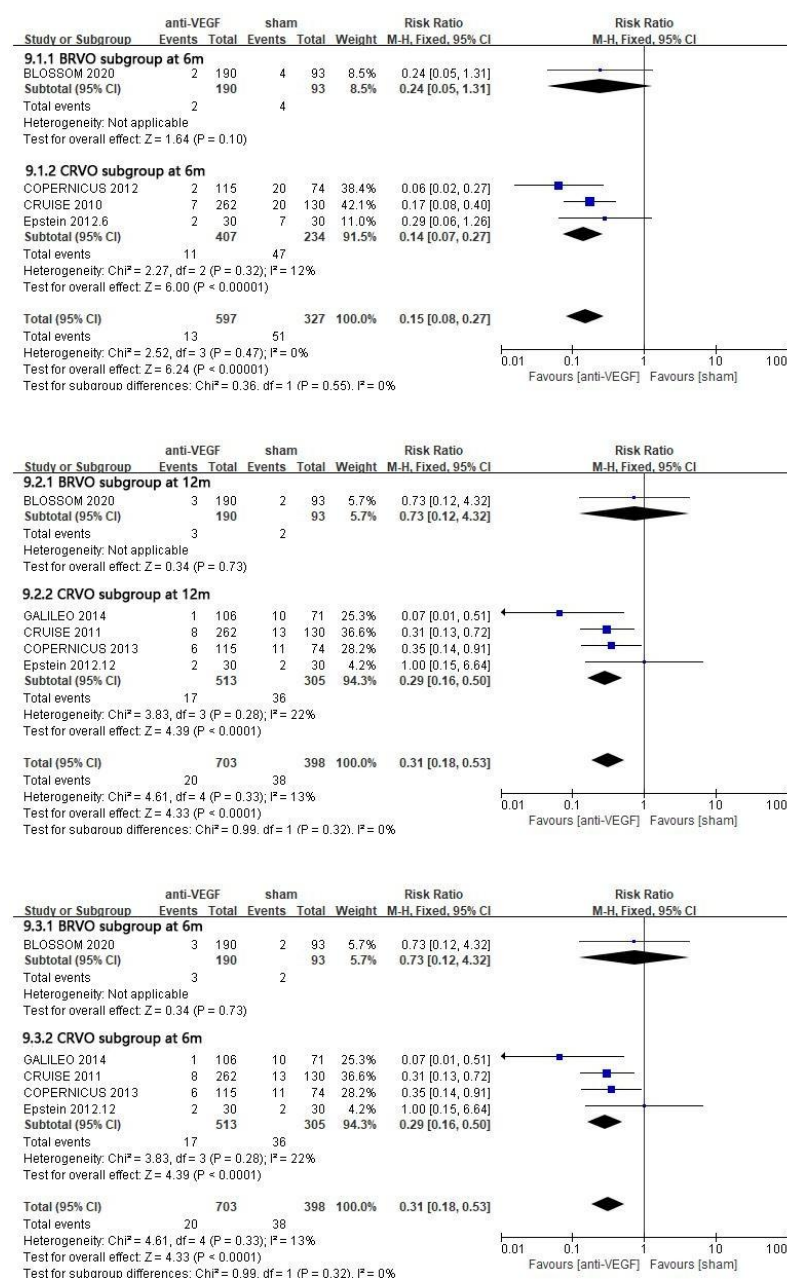

Fig.S7 A forest plot diagram comparing the outcome of the number of patients who lost VA  $\geq$  15 ETRD letters in BRVO and CRVO subgroups.

| Table S1 Subgroup analysis results of the efficacy outcomes |                        |             |               |                      |                            |                |                 |                           |          |
|-------------------------------------------------------------|------------------------|-------------|---------------|----------------------|----------------------------|----------------|-----------------|---------------------------|----------|
| Outcomes                                                    | Follow- up<br>(months) | Type of RVO | Control group | Number of<br>studies | Heterogeneity test results |                | Effect<br>model | Meta analysis results     |          |
|                                                             |                        |             |               |                      | P value                    | I <sup>2</sup> |                 | RRor MD (95%CI)           | P value  |
| Mean change in<br>BCVA                                      | 6                      | BRVO        | Sham          | 1                    | -                          | -              | fixed           | 7.50 [5.29, 9.71]         | <0.00001 |
|                                                             |                        |             | Steroids      | 1                    | -                          | -              | fixed           | 8.10 [5.05, 11.15]        | <0.00001 |
|                                                             |                        | CRVO        | Sham          | 5                    | 0.08                       | 52%            | random          | 15.86 [12.03, 19.69]      | <0.00001 |
|                                                             |                        |             | Steroids      | 3                    | 0.10                       | 57%            | random          | 13.11 [4.69, 21.54]       | 0.002    |
|                                                             | 12                     | BRVO        | Sham          | 1                    | -                          | -              | fixed           | 6.30 [4.00, 8.60]         | <0.00001 |
|                                                             |                        | CRVO        | Sham          | 4                    | 0.20                       | 36%            | fixed           | 8.74 [6.12, 11.35]        | <0.00001 |
| Improvement of<br>15 or more<br>ETDRS letters               | 6                      | BRVO        | Sham          | 1                    | -                          | -              | fixed           | 1.72 [1.19, 2.49]         | 0.004    |
|                                                             |                        |             | Steroids      | 1                    | -                          | -              | fixed           | 1.64 [1.25, 2.15]         | 0.0004   |
|                                                             |                        | CRVO        | Sham          | 4                    | 0.53                       | 0%             | fixed           | 3.12 [2.41, 4.06]         | <0.00001 |
|                                                             |                        |             | Steroids      | 1                    | -                          | -              | fixed           | 3.18 [2.12, 4.77]         | <0.00001 |
|                                                             | 12                     | BRVO        | Sham          | 1                    | -                          | -              | fixed           | 1.43 [1.07, 1.90]         | 0.01     |
|                                                             |                        | CRVO        | Sham          | 4                    | 0.69                       | 0%             | fixed           | 1.67 [1.39, 2.01]         | <0.00001 |
| Loss of 15 or<br>more ETDRS<br>letters                      | 6                      | BRVO        | Sham          | 1                    | -                          | -              | fixed           | 0.24 [0.05, 1.31]         | 0.10     |
|                                                             |                        |             | Steroids      | 1                    | -                          | -              | fixed           | 0.07 [0.00, 1.27]         | 0.07     |
|                                                             |                        | CRVO        | Sham          | 3                    | 0.32                       | 12%            | fixed           | 0.14 [0.07, 0.27]         | <0.00001 |
|                                                             |                        |             | Steroids      | 1                    | -                          | -              | fixed           | 0.03 [0.00, 0.22]         | 0.0006   |
|                                                             | 12                     | BRVO        | Sham          | 1                    | -                          | -              | fixed           | 0.73 [0.12, 4.32]         | 0.73     |
|                                                             |                        | CRVO        | Sham          | 4                    | 0.28                       | 22%            | fixed           | 0.29 [0.16, 0.50]         | <0.0001  |
| Mean change in<br>CRT                                       | 6                      | BRVO        | Sham          | 1                    | -                          | -              | fixed           | -57.50 [-108.57, -6.43]   | 0.03     |
|                                                             |                        |             | Steroids      | 1                    | -                          | -              | fixed           | -118.30 [-161.17, -75.43] | <0.00001 |



|                                |    |      |          |   |       |     |        |                            |          |
|--------------------------------|----|------|----------|---|-------|-----|--------|----------------------------|----------|
| Mean change in quality of life | 6  | CRVO | Sham     | 5 | 0.38  | 4%  | fixed  | -278.27 [-316.13, -240.41] | <0.00001 |
|                                |    |      | Steroids | 3 | 0.008 | 79% | random | -126.55 [-236.80, -16.29]  | 0.02     |
|                                |    | BRVO | Sham     | 1 | -     | -   | fixed  | 7.60 [4.30, 10.90]         | <0.00001 |
|                                |    |      | Steroids | 1 | -     | -   | fixed  | 4.40 [1.51, 7.29]          | 0.003    |
|                                | 12 | CRVO | Sham     | 3 | 0.44  | 0%  | fixed  | 4.70 [2.96, 6.44]          | <0.00001 |
|                                |    |      | Steroids | 1 | -     | -   | fixed  | 4.00 [1.11, 6.89]          | 0.007    |
|                                |    | BRVO | Sham     | 1 | -     | -   | fixed  | 6.30 [2.95, 9.65]          | 0.0002   |
|                                |    | CRVO | Sham     | 1 | -     | -   | fixed  | 3.30 [1.07, 5.53]          | 0.004    |
